# Supplementary material for: Psychometric properties of suicide risk assessments in young Black populations internationally: A scoping review
Source: Research Square preprint supplement (doi:10.21203/rs.3.rs-8253970/v1), 2025-12-03
Supplement: Supplementary file 1 [file 0ad244176e213ec2912bb407.docx]

Supplemental Materials

This document contains the table outlining the results from the COSMIN Risk of Bias results for studies in this review. Few studies computed content validity and responsiveness. Almost all studies computed criterion validity (e.g., sensitivity and specificity analyses) and internal consistency. Several studies computed factor analyses (i.e., structural validity) and only two studies examined measurement invariance.

e-Table 1. COSMIN Risk of Bias Results

| **Instrument** | **Author** | **Content Validity (Concept Elucidation;** | **Structural Validity** | **Internal Consistency** | **Cross-Cultural Validity/ Measurement Invariance** | **Reliability** | **Measurement Error** | **Criterion Validity** | **Hypothesis Testing for Construct Validity** | **Responsiveness** |
| --- | --- | --- | --- | --- | --- | --- | --- | --- | --- | --- |
| **Pilot Test Comprehensibility;** |
| **Patient Relevance** |
| **Professional Relevance;** |
| **Professional comprehensiveness;** |
| **Professional comprehensibility)** |
|  |
| ASQ | Abaddi et al., 2023 | N/A | N/A | N/A | N/A | N/A | N/A | N/A | N/A | N/A |
| N/A |
| N/A |
| N/A |
| N/A |
| N/A |
|  |
| ASQ | Ballard et al., 2017 | N/A | N/A | N/A | N/A | N/A | N/A | Very Good | N/A | N/A |
| N/A |
| N/A |
| N/A |
| N/A |
| N/A |
|  |
| ASQ and CASSY | Brent et al., 2023 | N/A | N/A | N/A | N/A | N/A | N/A | Very Good | N/A | N/A |
| N/A |
| N/A |
| N/A |
| N/A |
| N/A |
|  |
| ASQ | Devylder et al., 2019 | N/A | N/A | N/A | N/A | N/A | N/A | Very Good | N/A | N/A |
| N/A |
| N/A |
| N/A |
| N/A |
| N/A |
| ASQ | Haroz et al., 2021 | N/A | N/A | N/A | N/A | N/A | N/A | Very Good | N/A | N/A |
| N/A |
| N/A |
| N/A |
| N/A |
| N/A |
|  |
| ASQ | Horowitz et al., 2012 | Doubtful | N/A | N/A | N/A | N/A | N/A | Very Good | N/A | N/A |
| Doubtful |
| N/A |
| N/A |
| N/A |
| N/A |
|  |
| ASQ | Horowitz et al., 2023 | N/A | N/A | N/A | N/A | N/A | N/A | Very Good | N/A | N/A |
| N/A |
| N/A |
| N/A |
| N/A |
| N/A |
|  |
| BHS | Diamond et al., 2010 | Inadequate | Inadequate | Very Good | N/A | N/A | N/A | Very Good | Inadequate | N/A |
| Inadequate |
| N/A |
| Doubtful |
| Doubtful |
| Doubtful |
|  |
| CARS-S | Francois et al., 2025 | N/A | Inadequate | Very good | N/A | N/A | N/A | N/A | N/A | N/A |
| N/A |
| N/A |
| N/A |
| N/A |
| N/A |
|  |
| MSMHS | Chao & Green (2010) | Inadequate | Very Good | Very Good | N/A | Inadequate | N/A | N/A | Adequate | N/A |
| Inadequate |
| N/A |
| Doubtful |
| N/A |
| N/A |
|  |
| MAYSI-2 | Cauffman & Macintosh, 2006 | N/A | Doubtful | Inadequate | N/A | N/A | N/A | N/A | N/A | N/A |
| N/A |
| N/A |
| N/A |
| N/A |
| N/A |
|  |
| PANSI | Aloba et al., 2018 | N/A | Very Good | Very Good | N/A | N/A | N/A | Very Good | Very Good | N/A |
| N/A |
| N/A |
| N/A |
| N/A |
| N/A |
|  |
| PDSALH Uganda | Mutumba et al., 2015 | Adequate | Very Good | Very Good | N/A | N/A | N/A | N/A | Very Good | N/A |
| Adequate |
| N/A |
| Adequate |
| Adequate |
| Adequate |
|  |
| RUSS | Akpunne et al., 2023 | Very Good | Adequate | Very Good | N/A | N/A | N/A | Very Good | Very Good | N/A |
| N/A |
| N/A |
| Doubtful |
| Doubtful |
| Doubtful |
|  |
|  |  |  |  |  |  |  |  |  |  |  |
|  |  |  |  |  |  |  |  |  |  |  |
| SBQ-R | Adjorlolo et al., 2020 | N/A | Inadequate | Very Good | Inadequate | N/A | N/A | N/A | Very Good | N/A |
| N/A |
| N/A |
| N/A |
| N/A |
| N/A |
|  |
| SBQ-R | Aloba et al., 2017 | N/A | Adequate | Very Good | N/A | N/A | N/A | Very Good | Inadequate | N/A |
| N/A |
| N/A |
| N/A |
| N/A |
| N/A |
|  |
| SHBQ | Muehlenkamp et al., 2010 | N/A | Very Good | Very Good | Very Good | N/A | N/A | N/A | N/A | N/A |
| N/A |
| N/A |
| N/A |
| N/A |
| N/A |
|  |
| SIQ-JR | Reynolds & Mazza, 1999 | N/A | N/A | Doubtful | N/A | Doubtful | N/A | Very Good | Very Good | N/A |
| N/A |
| N/A |
| N/A |
| N/A |
| N/A |
|  |
| SIQ-Adult | Adeyemo et al., 2023 | N/A | Doubtful | Very Good | N/A | N/A | N/A | N/A | Very Good | N/A |
| N/A |
| N/A |
| N/A |
| N/A |
| N/A |
|  |
|  |  |  |  |  |  |  |  |  |  |  |
|  |  |  |  |  |  |  |  |  |  |  |
| YRBSS | Brener et al., 2001 | N/A | N/A | N/A | N/A | Adequate | N/A | N/A | N/A | N/A |
| N/A |
| N/A |
| N/A |
| N/A |
| N/A |
